# Supplementary material for: Promotion of the influenza vaccination to hospital staff during pre-employment health check: a prospective, randomised, controlled trial
Source: Springer Nature journal article supplement (doi:10.1186/s12995-020-00285-w), 2020-11-18
Supplement: MOESM2 [file 18599204]

Médecine du personnel

**Ne vous trompez  
pas d'ennemi!  
Méfiez-vous de la  
grippe, pas du  
vaccin.**

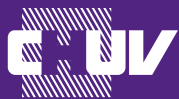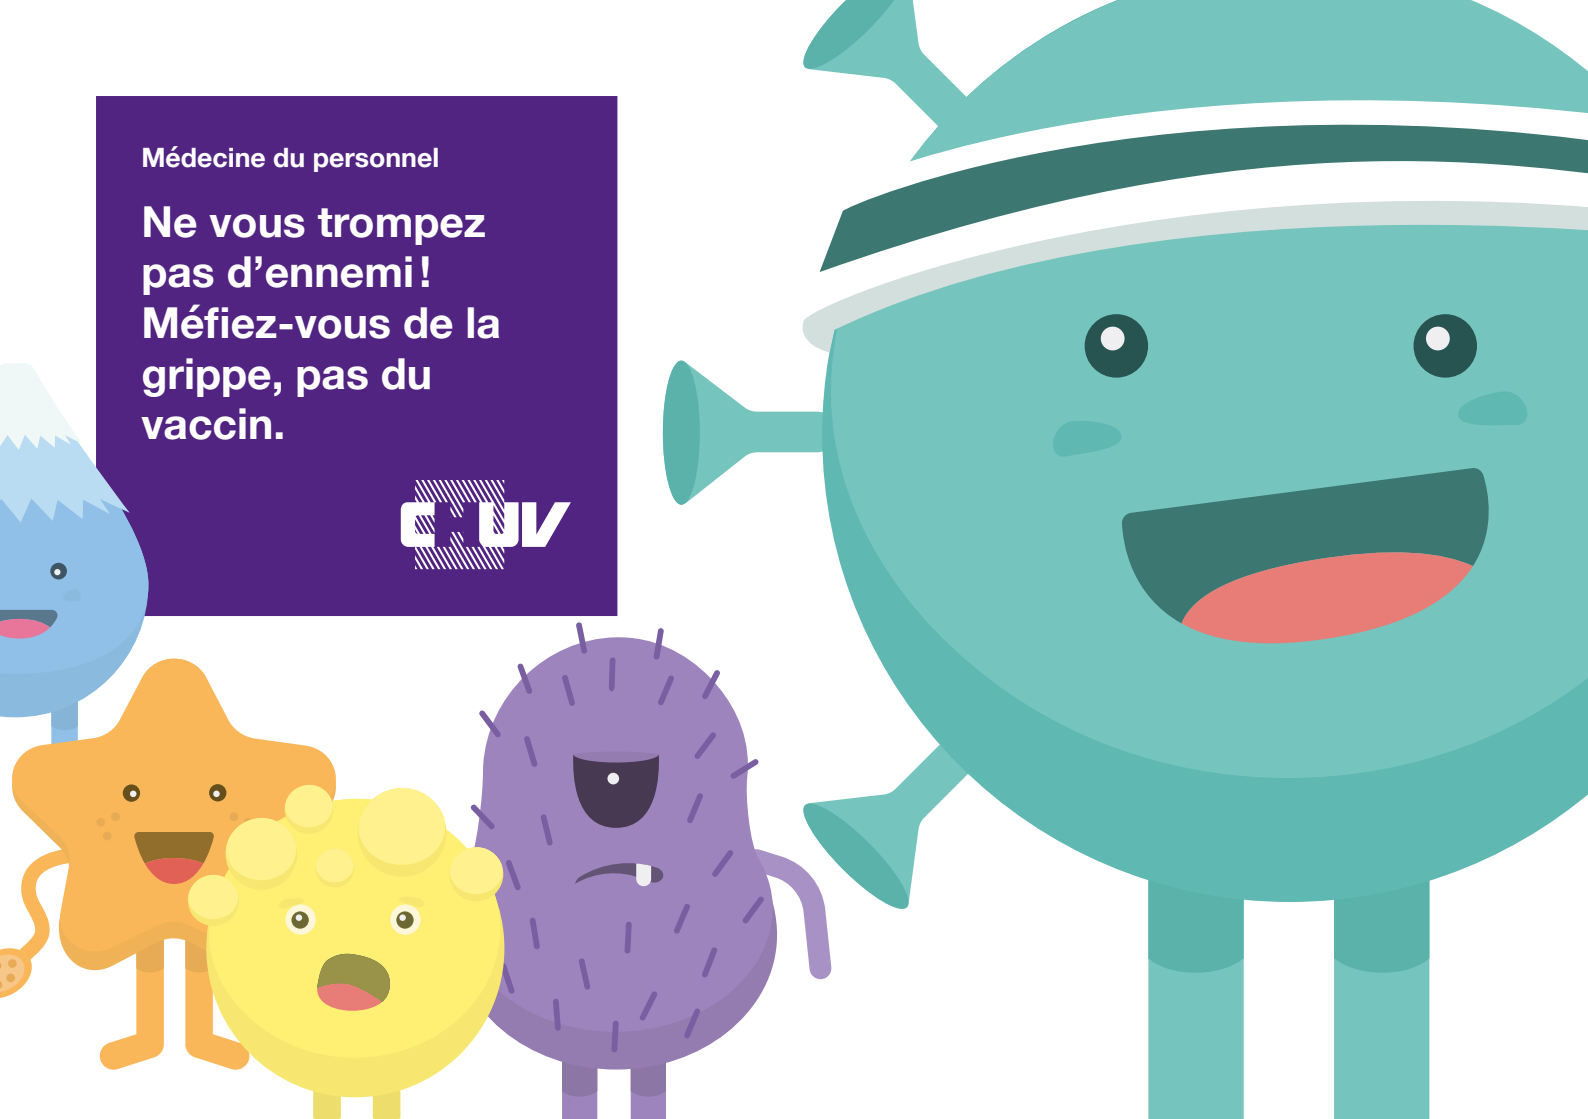

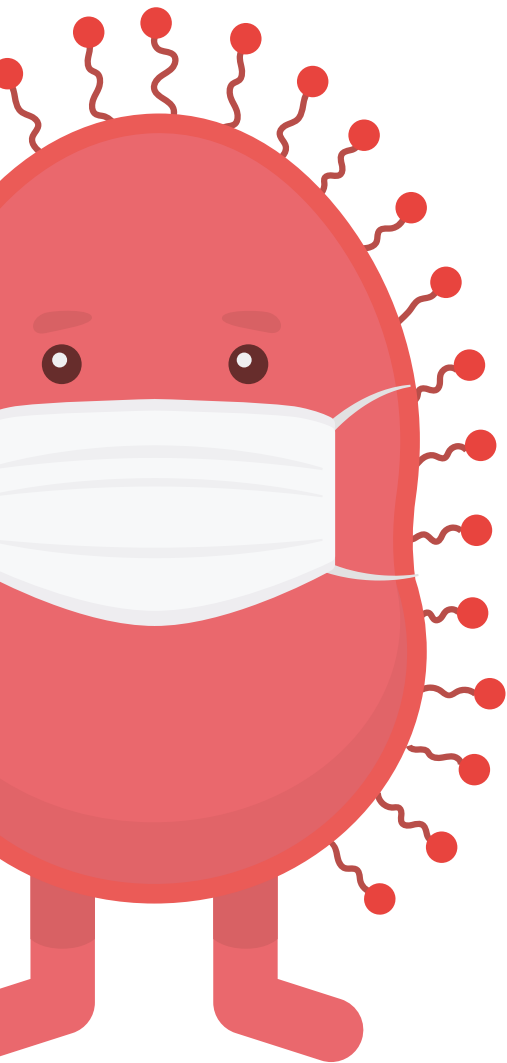

Vous en souvenez-vous ?

Lors de votre visite médicale d'engagement à l'Unité de médecine du personnel et d'entreprise, nous avons discuté des avantages de la vaccination contre la grippe.

La campagne de vaccination est désormais ouverte, alors... faites le bon choix !
