# Supplementary material for: Promotion of the influenza vaccination to hospital staff during pre-employment health check: a prospective, randomised, controlled trial
Source: Springer Nature journal article supplement (doi:10.1186/s12995-020-00285-w), 2020-11-18
Supplement: MOESM3 [file 18599204]

Exploratory comparisons in other subgroups

| Subgroup               | Characteristic, n            | Not vaccinated (%) | Vaccinated (%) | p     |
|------------------------|------------------------------|--------------------|----------------|-------|
| Patient-care employees |                              |                    |                |       |
|                        | Intervention: No, 72         | 39 (54)            | 33 (46)        |       |
|                        | Intervention: Yes, 86        | 44 (51)            | 42 (49)        | 0.750 |
|                        |                              |                    |                |       |
|                        | Mean age (years)             | 32                 | 31             | 0.751 |
|                        |                              |                    |                |       |
|                        | Sex: males, 36               | 22 (61)            | 14 (39)        |       |
|                        | Sex: females, 122            | 61 (50)            | 61 (50)        | 0.260 |
|                        |                              |                    |                |       |
|                        | Single: No, 126              | 69 (55)            | 57 (45)        |       |
|                        | Single: Yes, 32              | 14 (44)            | 18 (56)        | 0.323 |
|                        |                              |                    |                |       |
|                        | Swiss citizen: No, 74        | 35 (47)            | 39 (53)        |       |
|                        | Swiss citizen: Yes, 84       | 48 (57)            | 36 (43)        | 0.264 |
|                        |                              |                    |                |       |
|                        | Allergy: No, 111             | 61 (55)            | 50 (45)        |       |
|                        | Allergy: Yes, 47             | 22 (47)            | 25 (53)        | 0.386 |
|                        |                              |                    |                |       |
|                        | Asthma: No, 150              | 81 (54)            | 69 (46)        |       |
|                        | Asthma: Yes, 8               | 2 (25)             | 6(75)          | 0.151 |
|                        |                              |                    |                |       |
|                        | New employee: No, 75         | 42 (56)            | 33 (44)        |       |
|                        | New employee: Yes, 83        | 41 (49)            | 42 (51)        | 0.429 |
|                        |                              |                    |                |       |
|                        | Undergoing training: No, 151 | 79 (52)            | 72 (48)        |       |
|                        | Undergoing training: Yes, 7  | 4 (57)             | 3 (43)         | 1     |
|                        |                              |                    |                |       |
| Female sex             |                              |                    |                |       |

|          |                                  |          |          |       |
|----------|----------------------------------|----------|----------|-------|
|          | Intervention: No, 118            | 61 (52)  | 57 (48)  |       |
|          | Intervention: Yes, 139           | 73 (53)  | 66 (47)  | 0.901 |
|          |                                  |          |          |       |
|          | Mean age (years)                 | 32       | 32       | 0.724 |
|          |                                  |          |          |       |
|          | Single : No, 199                 | 106 (53) | 93 (47)  |       |
|          | Single: Yes, 58                  | 28 (48)  | 30 (52)  | 0.552 |
|          |                                  |          |          |       |
|          | Swiss citizen: No, 133           | 70 (52)  | 63 (47)  |       |
|          | Swiss citizen: Yes, 124          | 64 (52)  | 60 (48)  | 0.901 |
|          |                                  |          |          |       |
|          | Allergy : No, 186                | 102 (55) | 84 (45)  |       |
|          | Allergy: Yes, 71                 | 32 (45)  | 39 (55)  | 0.166 |
|          |                                  |          |          |       |
|          | Asthma: No, 247                  | 132 (53) | 115 (47) |       |
|          | Asthma: Yes, 10                  | 2 (20)   | 8 (80)   | 0.052 |
|          |                                  |          |          |       |
|          | New employee: No, 112            | 63 (56)  | 49 (44)  |       |
|          | New employee: Yes, 145           | 71 (52)  | 74 (51)  | 0.259 |
|          |                                  |          |          |       |
|          | Undergoing training: No, 239     | 121 (51) | 118 (49) |       |
|          | Undergoing training: Yes, 18     | 13 (72)  | 5 (28)   | 0.090 |
|          |                                  |          |          |       |
|          | Physician: No, 193               | 108 (56) | 85 (44)  |       |
|          | Physician: Yes, 64               | 26 (41)  | 38 (59)  | 0.043 |
|          |                                  |          |          |       |
|          | Patient-care employees: No, 135  | 73 (54)  | 62 (46)  |       |
|          | Patient-care employees: Yes, 122 | 61 (50)  | 61 (50)  | 0.534 |
|          |                                  |          |          |       |
| Allergic |                                  |          |          |       |
|          | Intervention: No, 49             | 25 (51)  | 24 (49)  |       |

|               |                                 |         |         |       |
|---------------|---------------------------------|---------|---------|-------|
|               | Intervention: Yes, 52           | 22 (42) | 30 (57) | 0.428 |
|               |                                 |         |         |       |
|               | Mean age (years)                | 32      | 33      | 0.682 |
|               |                                 |         |         |       |
|               | Sex: males, 30                  | 15 (50) | 15 (50) |       |
|               | Sex: females, 71                | 32 (45) | 39 (55) | 0.669 |
|               |                                 |         |         |       |
|               | Single: No, 77                  | 39 (51) | 38 (49) |       |
|               | Single: Yes, 24                 | 8 (33)  | 16 (67) | 0.164 |
|               |                                 |         |         |       |
|               | Swiss citizen: No, 59           | 27 (46) | 32 (54) |       |
|               | Swiss citizen: Yes, 42          | 20 (48) | 22 (52) | 1     |
|               |                                 |         |         |       |
|               | Asthma: No, 83                  | 43 (52) | 40 (48) |       |
|               | Asthma: Yes, 18                 | 4 (22)  | 14 (78) | 0.035 |
|               |                                 |         |         |       |
|               | New employee: No, 52            | 26 (50) | 26 (50) |       |
|               | New employee: Yes, 49           | 21 (43) | 28 (57) | 0.551 |
|               |                                 |         |         |       |
|               | Undergoing training: No, 96     | 44 (46) | 52 (54) |       |
|               | Undergoing training: Yes, 5     | 3 (60)  | 2 (40)  | 0.661 |
|               |                                 |         |         |       |
|               | Physician: No, 70               | 40 (57) | 30 (43) |       |
|               | Physician: Yes, 31              | 7 (23)  | 24 (77) | 0.002 |
|               |                                 |         |         |       |
|               | Patient-care employees: No, 54  | 25 (46) | 29 (54) |       |
|               | Patient-care employees: Yes, 47 | 22 (47) | 25 (53) | 1     |
|               |                                 |         |         |       |
| <b>Asthma</b> |                                 |         |         |       |
|               | Intervention: No, 11            | 5 (45)  | 6 (55)  |       |
|               | Intervention: Yes, 9            | 1 (11)  | 8 (89)  | 0.157 |

|              |                                |         |         |       |
|--------------|--------------------------------|---------|---------|-------|
|              |                                |         |         |       |
|              | Mean age (years)               | 32      | 31      | 0.532 |
|              |                                |         |         |       |
|              | Sex: males, 10                 | 4 (40)  | 6 (60)  |       |
|              | Sex: females, 10               | 2 (20)  | 8 (80)  | 0.628 |
|              |                                |         |         |       |
|              | Single: No, 14                 | 5 (36)  | 9 (64)  |       |
|              | Single: Yes, 6                 | 1 (17)  | 5 (83)  | 0.613 |
|              |                                |         |         |       |
|              | Swiss citizen: No, 17          | 6 (35)  | 11 (65) |       |
|              | Swiss citizen: Yes, 3          | 0 (0)   | 3 (100) | 0.521 |
|              |                                |         |         |       |
|              | Allergy: No, 2                 | 2 (100) | 0 (0)   |       |
|              | Allergy: Yes, 18               | 4 (22)  | 14 (78) | 0.079 |
|              |                                |         |         |       |
|              | New employee: No, 11           | 4 (36)  | 7 (64)  |       |
|              | New employee: Yes, 9           | 2 (22)  | 7 (78)  | 0.642 |
|              |                                |         |         |       |
|              | Undergoing training: No, 20    | 6 (30)  | 14 (70) |       |
|              | Undergoing training: Yes, 0    | 0 (0)   | 0 (0)   |       |
|              |                                |         |         |       |
|              | Physician: No, 12              | 5 (42)  | 7 (58)  |       |
|              | Physician: Yes, 8              | 1 (12)  | 7 (88)  | 0.325 |
|              |                                |         |         |       |
|              | Patient-care employees: No, 12 | 4 (33)  | 8 (67)  |       |
|              | Patient-care employees: Yes, 8 | 2 (25)  | 6 (75)  | 1     |
|              |                                |         |         |       |
| New employee |                                |         |         |       |
|              | Intervention: No, 81           | 38 (47) | 43 (53) |       |
|              | Intervention: Yes, 106         | 51 (48) | 55 (52) | 0.884 |
|              |                                |         |         |       |

|                            |                                 |         |         |        |
|----------------------------|---------------------------------|---------|---------|--------|
|                            | Mean age (years)                | 31      | 31      | 0.193  |
|                            |                                 |         |         |        |
|                            | Sex: males, 42                  | 18 (43) | 24 (57) |        |
|                            | Sex: females, 145               | 71 (49) | 74 (51) | 0.599  |
|                            |                                 |         |         |        |
|                            | Single: No, 146                 | 72 (49) | 74 (51) |        |
|                            | Single: Yes, 41                 | 17 (41) | 24 (59) | 0.384  |
|                            |                                 |         |         |        |
|                            | Swiss citizen: No, 78           | 44 (56) | 34 (44) |        |
|                            | Swiss citizen: Yes, 109         | 45 (41) | 64 (59) | 0.053  |
|                            |                                 |         |         |        |
|                            | Allergy: No, 138                | 68 (49) | 70 (51) |        |
|                            | Allergy: Yes, 49                | 21 (43) | 28 (57) | 0.507  |
|                            |                                 |         |         |        |
|                            | Asthma: No, 178                 | 87 (49) | 91 (51) |        |
|                            | Asthma: Yes, 9                  | 2 (22)  | 7 (78)  | 0.174  |
|                            |                                 |         |         |        |
|                            | Undergoing training: No, 171    | 76 (44) | 95 (56) |        |
|                            | Undergoing training: Yes, 16    | 13 (81) | 3 (19)  | 0.007  |
|                            |                                 |         |         |        |
|                            | Physician: No, 140              | 78 (56) | 62 (44) |        |
|                            | Physician: Yes, 47              | 11 (23) | 36 (77) | 0.000  |
|                            |                                 |         |         |        |
|                            | Patient-care employees: No, 104 | 48 (46) | 56 (54) |        |
|                            | Patient-care employees: Yes, 83 | 41 (49) | 42 (51) | 0.768  |
|                            |                                 |         |         |        |
| <u>Undergoing training</u> |                                 |         |         |        |
|                            | Intervention: No, 6             | 5 (83)  | 1 (17)  |        |
|                            | Intervention: Yes, 15           | 11 (73) | 4 (27)  | 1      |
|                            |                                 |         |         |        |
|                            | Mean age (years)                | 25      | 21      | 0.0128 |

|  |                                |         |        |       |
|--|--------------------------------|---------|--------|-------|
|  |                                |         |        |       |
|  | Sex: males, 3                  | 3 (100) | 0 (0)  |       |
|  | Sex: females, 18               | 13 (72) | 5 (28) | 0.549 |
|  |                                |         |        |       |
|  | Single: No, 21                 | 16 (76) | 5 (24) |       |
|  | Single: Yes, 0                 | 0 (0)   | 0 (0)  |       |
|  |                                |         |        |       |
|  | Swiss citizen: No, 15          | 12 (80) | 3 (20) |       |
|  | Swiss citizen: Yes, 6          | 4 (67)  | 2 (33) | 0.598 |
|  |                                |         |        |       |
|  | Allergy: No, 16                | 13 (81) | 3 (19) |       |
|  | Allergy: Yes, 5                | 3 (60)  | 2 (40) | 0.553 |
|  |                                |         |        |       |
|  | Asthma: No, 21                 | 16 (76) | 5 (24) |       |
|  | Asthma: Yes, 0                 | 0 (0)   | 0(0)   |       |
|  |                                |         |        |       |
|  | New employee: No, 5            | 3 (60)  | 2 (40) |       |
|  | New employee: Yes, 16          | 13 (81) | 3 (19) | 0.553 |
|  |                                |         |        |       |
|  | Physician: No, 20              | 15 (75) | 5 (25) |       |
|  | Physician: Yes, 1              | 1 (100) | 0 (0)  | 1     |
|  |                                |         |        |       |
|  | Patient-care employees: No, 14 | 12 (86) | 2 (14) |       |
|  | Patient-care employees: Yes, 7 | 4 (57)  | 3 (43) | 0.280 |
